# Supplementary material for: National Patterns in Prescription Opioid Use and Misuse Among Cancer Survivors in the United States
Source: PubMed Central journal article supplement (PMC7431994; doi:10.1001/jamanetworkopen.2020.13605), 2020-08-17
Supplement: jamanetwopen-3-e2013605-s001.pdf [file jamanetwopen-3-e2013605-s001.pdf]

## Supplementary Online Content

Jairam V, Yang DX, Verma V, Yu JB, Park HS. National patterns in prescription opioid use and misuse among cancer survivors in the United States. *JAMA Netw Open*. 2020;3(8):e2013605. doi:10.1001/jamanetworkopen.2020.13605

**eTable 1.** Weighted Prevalence of Prescription Opioid Use and Misuse by Comorbidity History

**eTable 2.** Baseline Characteristics of Adult Population Stratified by Reported Cancer History

**eTable 3.** Baseline Characteristics of Adult Cancer Population Stratified by Recency of Cancer History

This supplementary material has been provided by the authors to give readers additional information about their work.

**eTable 1.** Weighted Prevalence of Prescription Opioid Use and Misuse by Comorbidity History

| <b>Comorbidity</b>                    | <b>Weighted % (95% CI)</b>     |                                   |
|---------------------------------------|--------------------------------|-----------------------------------|
|                                       | <b>Prescription Opioid Use</b> | <b>Prescription Opioid Misuse</b> |
| Asthma                                | 39.7 (38.5 – 40.9)             | 5.2 (4.8 – 5.7)                   |
| Cancer                                | 42.8 (41.2 – 44.5)             | 3.1 (2.7 – 3.6)                   |
| Chronic Obstructive Pulmonary Disease | 52.6 (50.6 – 54.6)             | 4.8 (4.1 – 5.5)                   |
| Diabetes                              | 42.8 (41.7 – 44.0)             | 2.9 (2.6 – 3.3)                   |
| Hepatitis B or C                      | 42.7 (39.0 – 46.6)             | 8.3 (6.8 – 10.1)                  |
| Heart Condition                       | 42.1 (40.7 – 43.6)             | 3.4 (3.0 – 3.8)                   |
| HIV or AIDS                           | 38.5 (31.6 – 45.8)             | 10.6 (7.0 – 15.8)                 |
| Hypertension                          | 41.2 (40.2 – 42.2)             | 3.3 (3.1 – 3.5)                   |
| Kidney Disease                        | 50.5 (47.9 – 53.1)             | 3.4 (2.7 – 4.4)                   |
| Liver Cirrhosis                       | 56.4 (49.3 – 63.1)             | 4.9 (2.9 – 8.1)                   |

Abbreviations: CI, confidence interval

**eTable 2.** Baseline Characteristics of Adult Population Stratified by Reported Cancer History

| Characteristics                | Weighted % (95% CI)                             |                                            | P-Value |
|--------------------------------|-------------------------------------------------|--------------------------------------------|---------|
|                                | No Cancer History <sup>a</sup><br>(N = 164,023) | Cancer History <sup>a</sup><br>(N = 5,139) |         |
| <b>Age</b>                     |                                                 |                                            | <0.001  |
| 18 to 34                       | 31.6 (31.1 – 32.1)                              | 4.9 (4.6 – 5.4)                            |         |
| 35 to 64                       | 50.7 (50.3 – 51.1)                              | 41.8 (40.2 – 43.3)                         |         |
| 65+                            | 17.7 (17.3 – 18.1)                              | 53.2 (51.7 – 54.9)                         |         |
| <b>Sex</b>                     |                                                 |                                            | <0.001  |
| Male                           | 48.7 (48.3 – 49.0)                              | 39.8 (37.8 – 41.8)                         |         |
| Female                         | 51.3 (51.0 – 51.7)                              | 60.2 (58.2 – 62.2)                         |         |
| <b>Race</b>                    |                                                 |                                            | <0.001  |
| White                          | 63.0 (62.4 – 63.5)                              | 81.2 (79.8 – 82.5)                         |         |
| African-American               | 12.2 (11.8 – 12.6)                              | 7.1 (6.2 – 8.0)                            |         |
| Hispanic                       | 16.5 (16.0 – 16.9)                              | 7.2 (6.4 – 8.1)                            |         |
| Other                          | 8.3 (8.1 – 8.6)                                 | 4.5 (3.7 – 5.5)                            |         |
| <b>Year</b>                    |                                                 |                                            | 0.346   |
| 2015                           | 24.7 (24.3 – 25.1)                              | 24.4 (22.7 – 26.2)                         |         |
| 2016                           | 24.8 (24.5 – 25.1)                              | 24.9 (23.3 – 26.6)                         |         |
| 2017                           | 25.1 (24.9 – 25.4)                              | 24.1 (22.5 – 25.7)                         |         |
| 2018                           | 25.2 (24.8 – 25.6)                              | 26.6 (24.8 – 28.5)                         |         |
| <b>Education Level</b>         |                                                 |                                            | <0.001  |
| Less than high school          | 13.0 (12.8 – 13.3)                              | 9.2 (8.0 – 10.6)                           |         |
| High school graduate           | 25.1 (24.7 – 25.4)                              | 23.8 (22.1 – 25.5)                         |         |
| Some college/Associates Degree | 31.0 (30.6 – 31.4)                              | 31.5 (29.6 – 33.5)                         |         |
| College graduate               | 30.9 (30.3 – 31.4)                              | 35.5 (33.5 – 37.6)                         |         |
| <b>Health Insurance</b>        |                                                 |                                            | <0.001  |
| Private                        | 52.9 (52.5 – 53.3)                              | 32.9 (31.2 – 34.6)                         |         |
| Public                         | 34.5 (34.1 – 34.9)                              | 63.8 (62.1 – 65.5)                         |         |
| Other                          | 2.3 (2.2 – 2.4)                                 | 0.7 (0.4 – 1.0)                            |         |
| Unknown                        | 10.3 (10.0 – 10.5)                              | 2.6 (2.2 – 3.1)                            |         |
| <b>Income</b>                  |                                                 |                                            | <0.001  |
| <\$20,000                      | 16.8 (16.4 – 17.1)                              | 13.5 (12.2 – 14.8)                         |         |
| \$20,000 - \$49,999            | 29.6 (29.2 – 30.0)                              | 31.2 (29.6 – 32.9)                         |         |
| \$50,000 - \$74,999            | 15.9 (15.6 – 16.2)                              | 17.0 (15.9 – 18.2)                         |         |
| \$75,000+                      | 37.6 (37.0 – 38.2)                              | 38.2 (36.4 – 40.1)                         |         |
| <b>Setting</b>                 |                                                 |                                            | <0.001  |
| Urban                          | 85.8 (85.4 – 86.3)                              | 83.5 (82.3 – 84.6)                         |         |
| Rural                          | 14.1 (13.7 – 14.5)                              | 16.5 (15.4 – 17.7)                         |         |
| <b>Employment</b>              |                                                 |                                            | <0.001  |
| Full Time                      | 50.8 (50.4 – 51.2)                              | 29.4 (27.5 – 31.3)                         |         |
| Part Time                      | 13.2 (12.9 – 13.4)                              | 11.7 (10.7 – 12.8)                         |         |
| Unemployed                     | 4.6 (4.4 – 4.7)                                 | 1.7 (1.4 – 2.1)                            |         |
| Other                          | 31.4 (30.9 – 31.8)                              | 57.1 (55.4 – 58.8)                         |         |
| <b>Marital Status</b>          |                                                 |                                            | <0.001  |

|                                             |                    |                    |        |
|---------------------------------------------|--------------------|--------------------|--------|
| Married                                     | 51.3 (50.8 – 51.8) | 59.8 (57.8 – 61.8) |        |
| Widowed                                     | 5.3 (5.1 – 5.6)    | 13.6 (12.3 – 15.0) |        |
| Divorced/Separated                          | 13.7 (13.4 – 14.0) | 16.9 (15.5 – 18.5) |        |
| Never Married                               | 29.6 (29.1 – 30.0) | 9.7 (8.8 – 10.6)   |        |
| <b>Health Status</b>                        |                    |                    | <0.001 |
| Excellent                                   | 21.7 (21.3 – 22.1) | 12.6 (11.5 – 13.9) |        |
| Very good                                   | 36.2 (35.8 – 36.5) | 29.4 (27.6 – 31.1) |        |
| Good                                        | 28.8 (28.3 – 29.2) | 34.2 (32.3 – 36.1) |        |
| Fair                                        | 10.8 (10.5 – 11.1) | 16.3 (15.0 – 17.8) |        |
| Poor                                        | 2.4 (2.3 – 2.5)    | 7.4 (6.4 – 8.6)    |        |
| Unknown                                     | 0.01 (0.01 – 0.03) | 0                  |        |
| <b>Major Depressive Episode within Year</b> | 6.9 (6.7 – 7.1)    | 6.9 (6.1 – 7.8)    | 0.966  |
| Unknown                                     | 0.7 (0.7 – 0.8)    | 0.7 (0.4 – 1.1)    |        |
| <b>Alcohol Use Disorder</b>                 | 6.1 (6.0 – 6.3)    | 3.0 (2.5 – 3.6)    | <0.001 |
| <b>Non-Opioid Drug Use Disorder</b>         | 2.7 (2.6 – 2.8)    | 1.4 (1.1 – 1.8)    | <0.001 |
| <b>Cancer Type<sup>b</sup></b>              |                    |                    | N/A    |
| Bladder                                     | -                  | 3.5 (2.8 – 4.2)    |        |
| Breast                                      | -                  | 2.5 (2.3 – 2.6)    |        |
| Cervix                                      | -                  | 6.3 (5.6 – 7.1)    |        |
| Colon/Rectum                                | -                  | 7.0 (6.1 – 7.9)    |        |
| Esophagus/Stomach                           | -                  | 1.4 (1.0 – 1.9)    |        |
| Gallbladder/Liver/Pancreas                  | -                  | 1.5 (1.1 – 2.0)    |        |
| Hematologic                                 | -                  | 8.3 (7.3 – 9.5)    |        |
| Kidney                                      | -                  | 2.7 (2.1 – 3.4)    |        |
| Larynx/Windpipe/Lung                        | -                  | 3.8 (3.0 – 4.7)    |        |
| Melanoma                                    | -                  | 9.5 (8.5 – 10.5)   |        |
| Mouth/Tongue/Lip/Throat/Pharynx             | -                  | 1.5 (1.1 – 1.9)    |        |
| Ovary                                       | -                  | 2.9 (2.3 – 3.6)    |        |
| Prostate/Testis                             | -                  | 15.6 (14.2 – 17.1) |        |
| Uterus                                      | -                  | 4.4 (3.8 – 5.2)    |        |
| Thyroid                                     | -                  | 4.0 (3.5 – 4.7)    |        |

Abbreviations: CI, confidence interval

<sup>a</sup>Percentages may not add up to 100 due to rounding.

<sup>b</sup>Percentages add up to > 100 due to respondents reporting multiple cancers

**eTable 3.** Baseline Characteristics of Adult Cancer Population Stratified by Recency of Cancer History

| Characteristics                | Weighted % (95% CI)                                    |                                                        | P-Value |
|--------------------------------|--------------------------------------------------------|--------------------------------------------------------|---------|
|                                | More Recent Cancer History <sup>a</sup><br>(N = 1,243) | Less Recent Cancer History <sup>a</sup><br>(N = 3,896) |         |
| <b>Age</b>                     |                                                        |                                                        | 0.763   |
| 18 to 34                       | 4.6 (3.8 – 5.6)                                        | 5.1 (4.5 – 5.6)                                        |         |
| 35 to 64                       | 41.6 (38.1 – 45.1)                                     | 41.8 (40.2 – 43.4)                                     |         |
| 65+                            | 53.8 (50.2 – 57.4)                                     | 53.1 (51.5 – 54.7)                                     |         |
| <b>Sex</b>                     |                                                        |                                                        | <0.001  |
| Male                           | 49.0 (44.7 – 53.3)                                     | 36.9 (34.7 – 65.2)                                     |         |
| Female                         | 51.0 (46.7 – 55.3)                                     | 63.1 (60.9 – 65.2)                                     |         |
| <b>Race</b>                    |                                                        |                                                        | 0.042   |
| White                          | 78.8 (75.8 – 81.5)                                     | 81.9 (80.3 – 83.4)                                     |         |
| African-American               | 9.4 (7.5 – 11.8)                                       | 6.3 (5.4 – 7.4)                                        |         |
| Hispanic                       | 7.4 (5.7 – 9.6)                                        | 7.2 (6.3 – 8.2)                                        |         |
| Other                          | 4.4 (3.1 – 6.2)                                        | 4.5 (3.7 – 5.6)                                        |         |
| <b>Year</b>                    |                                                        |                                                        | 0.012   |
| 2015                           | 24.1 (21.1 – 27.4)                                     | 24.5 (22.6 – 26.5)                                     |         |
| 2016                           | 22.0 (19.2 – 25.1)                                     | 25.8 (23.9 – 27.6)                                     |         |
| 2017                           | 23.2 (20.4 – 26.3)                                     | 24.4 (22.6 – 26.2)                                     |         |
| 2018                           | 30.6 (27.3 – 34.1)                                     | 25.3 (23.5 – 27.2)                                     |         |
| <b>Education Level</b>         |                                                        |                                                        | 0.009   |
| Less than high school          | 12.5 (10.0 – 15.4)                                     | 8.2 (7.0 – 9.6)                                        |         |
| High school graduate           | 24.2 (20.9 – 27.8)                                     | 23.6 (21.8 – 25.5)                                     |         |
| Some college/Associates Degree | 29.9 (26.3 – 33.8)                                     | 32.0 (30.1 – 34.0)                                     |         |
| College graduate               | 33.3 (29.5 – 27.4)                                     | 36.2 (33.8 – 38.5)                                     |         |
| <b>Health Insurance</b>        |                                                        |                                                        | 0.002   |
| Private                        | 30.4 (27.2 – 33.7)                                     | 33.7 (31.9 – 35.4)                                     |         |
| Public                         | 67.6 (64.3 – 70.6)                                     | 62.6 (60.9 – 64.3)                                     |         |
| Other                          | 0.8 (0.4 – 1.9)                                        | 0.6 (0.4 – 1.0)                                        |         |
| Unknown                        | 1.1 (0.7 – 2.0)                                        | 3.0 (2.5 – 3.7)                                        |         |
| <b>Income</b>                  |                                                        |                                                        | 0.017   |
| <\$20,000                      | 16.7 (14.4 – 19.2)                                     | 12.4 (11.0 – 14.1)                                     |         |
| \$20,000 - \$49,999            | 31.8 (28.4 – 35.3)                                     | 31.0 (29.1 – 33.1)                                     |         |
| \$50,000 - \$74,999            | 15.7 (13.2 – 18.6)                                     | 17.4 (16.1 – 18.8)                                     |         |
| \$75,000+                      | 35.7 (32.4 – 39.2)                                     | 39.0 (37.1 – 41.0)                                     |         |
| <b>Setting</b>                 |                                                        |                                                        | 0.857   |
| Urban                          | 83.6 (80.8 – 86.2)                                     | 83.4 (82.1 – 84.6)                                     |         |
| Rural                          | 16.3 (13.8 – 19.2)                                     | 16.6 (15.4 – 17.9)                                     |         |
| <b>Employment</b>              |                                                        |                                                        | 0.024   |
| Full Time                      | 26.2 (22.7 – 30.1)                                     | 30.4 (28.5 – 32.3)                                     |         |
| Part Time                      | 10.4 (8.1 – 13.3)                                      | 12.2 (11.1 – 13.3)                                     |         |
| Unemployed                     | 1.4 (0.8 – 2.4)                                        | 1.8 (1.5 – 2.3)                                        |         |
| Other                          | 61.9 (58.1 – 65.6)                                     | 55.6 (54.0 – 57.2)                                     |         |

|                                             |                    |                    |        |
|---------------------------------------------|--------------------|--------------------|--------|
| <b>Marital Status</b>                       |                    |                    | 0.399  |
| Married                                     | 57.8 (54.4 – 61.3) | 60.4 (58.1 – 62.6) |        |
| Widowed                                     | 14.8 (12.4 – 17.6) | 13.2 (11.7 – 15.0) |        |
| Divorced/Separated                          | 16.8 (14.4 – 19.6) | 16.9 (15.3 – 18.6) |        |
| Never Married                               | 10.4 (9.2 – 11.8)  | 9.4 (8.5 – 10.4)   |        |
| <b>Health Status</b>                        |                    |                    | <0.001 |
| Excellent                                   | 5.9 (4.2 – 8.1)    | 14.8 (13.4 – 16.2) |        |
| Very good                                   | 22.6 (19.2 – 26.3) | 31.5 (29.4 – 33.7) |        |
| Good                                        | 32.4 (29.2 – 35.8) | 34.8 (32.5 – 37.1) |        |
| Fair                                        | 23.1 (20.9 – 25.4) | 14.2 (12.6 – 16.0) |        |
| Poor                                        | 16.0 (12.8 – 19.6) | 4.7 (3.9 – 5.7)    |        |
| Unknown                                     | 0.01 (0.0 – 0.1)   | 0                  |        |
| <b>Major Depressive Episode within Year</b> | 7.6 (5.9 – 9.6)    | 6.7 (5.6 – 7.9)    | 0.613  |
| Unknown                                     | 0.9 (0.4 – 1.9)    | 0.7 (0.4 – 1.2)    |        |
| <b>Alcohol Use Disorder</b>                 | 3.0 (2.1 – 4.4)    | 3.0 (2.4 – 3.8)    | 0.977  |
| <b>Non-Opioid Drug Use Disorder</b>         | 1.1 (0.6 – 1.8)    | 1.5 (1.1 – 2.0)    | 0.180  |
| <b>Cancer Type<sup>b</sup></b>              |                    |                    | <0.001 |
| Bladder                                     | 4.8 (3.5 – 6.5)    | 3.0 (2.4 – 3.8)    |        |
| Breast                                      | 17.9 (14.7 – 21.6) | 27.0 (25.1 – 29.1) |        |
| Cervix                                      | 3.6 (2.6 – 5.0)    | 7.2 (6.3 – 8.1)    |        |
| Colon/Rectum                                | 7.3 (5.7 – 9.4)    | 6.9 (5.9 – 8.0)    |        |
| Esophagus/Stomach                           | 2.0 (1.1 – 3.4)    | 1.2 (0.8 – 1.8)    |        |
| Gallbladder/Liver/Pancreas                  | 4.0 (2.7 – 5.8)    | 0.7 (0.4 – 1.1)    |        |
| Hematologic                                 | 13.9 (11.2 – 17.1) | 6.6 (5.6 – 7.7)    |        |
| Kidney                                      | 2.9 (1.8 – 4.8)    | 2.6 (2.0 – 3.4)    |        |
| Larynx/Windpipe/Lung                        | 6.9 (4.9 – 9.4)    | 2.8 (2.2 – 3.6)    |        |
| Melanoma                                    | 10.4 (8.3 – 13.0)  | 9.2 (8.1 – 10.4)   |        |
| Mouth/Tongue/Lip/Throat/Pharynx             | 1.3 (0.7 – 2.1)    | 1.5 (1.1 – 2.1)    |        |
| Ovary                                       | 2.0 (1.1 – 3.4)    | 3.2 (2.5 – 3.9)    |        |
| Prostate/Testis                             | 18.8 (16.0 – 21.9) | 14.6 (13.1 – 16.3) |        |
| Uterus                                      | 2.4 (1.5 – 3.9)    | 5.1 (4.4 – 5.9)    |        |
| Thyroid                                     | 2.2 (1.5 – 3.2)    | 4.6 (3.9 – 5.4)    |        |

Abbreviations: CI, confidence interval

<sup>a</sup>Percentages may not add up to 100 due to rounding.

<sup>b</sup>Percentages add up to > 100 due to respondents reporting multiple cancers
